# Supplementary material
Source: publisher figshare collection journal article supplement (https://acs.figshare.com/ndownloader/files/4710904)
Supplement: Supplementary file 1 [file 4710904]

data_global_journal_name_full               Crystal _journal_coden_Cambridge         0179_journal_year                    ?_journal_volume                  ?_journal_page_first              ?# The loop structure below should contain the names and addresses of all        # authors, in the required order of publication. Repeat as necessary.           loop__publ_author_name_publ_author_address_publ_author_footnote'Hani Amouri';                                                                               Universite Pierre et Marie CurieLaboratoire de Chimie Inorganique et Materiaux Moleculaires UMR 7071, Bat F, Case 424 place Jussieu75252 Paris cedex 05France;;                                                                               ?                                                       ;'Carine Guyard-Duhayon';                                                                               Universite Pierre et Marie CurieLaboratoire de Chimie Inorganique et Materiaux Moleculaires UMR 7071, Bat F, Case 424 place Jussieu75252 Paris cedex 05France;;                                                                               ?                                                                ;_publ_contact_author_address     ;                                                                               Universite Pierre et Marie CurieLaboratoire de Chimie Inorganique et Materiaux Moleculaires UMR 7071, Bat F, Case 424 place Jussieu75252 Paris cedex 05France;_publ_contact_author_email       amouri@ccr.jussieu.fr_publ_contact_author_fax         '(33)1 44 27 38 41'_publ_contact_author_phone       '(33)1 44 27 30 83'_publ_contact_author_name        'Hani Amouri'#  2111022    Compound X                                       # Check this file using the IUCr facility at:                                   # http://www/iucr.ac.uk/iucr-top/journals/acta/c/services/checkcif.html         #****************************************************************************   # The contents of this file between this point and the next #***** line         # are held in the file REFCIF.DAT                                               # This is a character file which you may edit to reflect local conditions       #                                                                               # Items which need looking at are represented by a '?'                          # Items for which there are choices are prefixed with 'choose from'             #                                                                               # 1. SUBMISSION DETAILS                                                         _publ_contact_letter             ;                                                                               ;_publ_requested_category         CO # choose from: FI FM FO CI CM CO AD#            _publ_requested_coeditor_name    ?data_CRYSTALS_cif3_audit_creation_date             03-31-03_audit_creation_method           CRYSTALS_ver_12-03-99#  12201540    Compound X                                      _publ_section_comment            #Text of the paper                                       ;                                                                               Important values of final difference map are due to residual electronic densities located on Ir and Ag atoms and CF3SO3;_publ_section_exptl_refinement   # see also _refine_ls_hydrogen for refinement keywords.                         ;                                                                               H atoms placed geometrically after each cycle                                  ;#==========================================================================     _chemical_name_systematic        # IUPAC name, in full                           ;                                                                               ?                                                                               ;_chemical_melting_point          ?# choose from 'full, fullcycle, atomblock, userblock, diagonal, sparse'         _refine_ls_matrix_type           full# choose from 'heavy, direct, difmap, geom'                                     _atom_sites_solution_primary     direct# _atom_sites_solution_secondary            difmap                              _atom_sites_solution_hydrogens   geom# choose from 'none, undef, noref, refall, refxyz, refU, constr, mixed'         _refine_ls_hydrogen_treatment    mixed#****************************************************************************   # General computing #============================================================= _computing_structure_refinement  ; CRYSTALS (Watkin et al 2001) ;_computing_publication_material  ; CRYSTALS (Watkin et al 2001) ;_computing_molecular_graphics    ; CAMERON (Watkin et al 1996) ;#============================================================= _cell_length_a                   8.1689(3)_cell_angle_alpha                97.128(5)_cell_length_b                   11.0554(6)_cell_angle_beta                 105.760(5)_cell_length_c                   13.7066(8)_cell_angle_gamma                105.525(4)_cell_volume                     1121.71(11)_symmetry_cell_setting           Triclinic_symmetry_space_group_name_H-M   'P -1 'loop__symmetry_equiv_pos_as_xyzx,y,z-x,-y,-z# choose from: rm (reference molecule of # known chirality), ad (anomolous # dispersion - ie. Flack param), rmad # (both rm and ad), syn (known from # synthetic pathway), unk (unknown) # or . (not applicable). _chemical_absolute_configuration .loop__atom_type_symbol_atom_type_scat_dispersion_real_atom_type_scat_dispersion_imag_atom_type_scat_Cromer_Mann_a1_atom_type_scat_Cromer_Mann_b1_atom_type_scat_Cromer_Mann_a2_atom_type_scat_Cromer_Mann_b2_atom_type_scat_Cromer_Mann_a3_atom_type_scat_Cromer_Mann_b3_atom_type_scat_Cromer_Mann_a4_atom_type_scat_Cromer_Mann_b4_atom_type_scat_Cromer_Mann_c_atom_type_scat_source'Ir  ' -1.4442 7.9887 27.3049 1.5928 16.7296 8.8655 15.6115 0.4179 5.833845.0011 11.4722 International_Tables_Vol_IV_Table_2.2B'Ag  ' -0.8971 1.1015 19.2808 0.6446 16.6885 7.4726 4.8045 24.6605 1.046399.8156 5.1790 International_Tables_Vol_IV_Table_2.2B'C   ' 0.0033 0.0016 2.3100 20.8439 1.0200 10.2075 1.5886 0.5687 0.8650 51.65120.2156 International_Tables_Vol_IV_Table_2.2B'H   ' 0.0000 0.0000 0.4930 10.5109 0.3229 26.1257 0.1402 3.1424 0.0408 57.79980.0030 International_Tables_Vol_IV_Table_2.2B'N   ' 0.0061 0.0033 12.2126 0.0057 3.1322 9.8933 2.0125 28.9975 1.1663 0.5826-11.5290 International_Tables_Vol_IV_Table_2.2B'O   ' 0.0106 0.0060 3.0485 13.2771 2.2868 5.7011 1.5463 0.3239 0.8670 32.90890.2508 International_Tables_Vol_IV_Table_2.2B'F   ' 0.0171 0.0103 3.5392 10.2825 2.6412 4.2944 1.5170 0.2615 1.0243 26.14760.2776 International_Tables_Vol_IV_Table_2.2B'B   ' 0.0013 0.0007 2.0545 23.2185 1.3326 1.0210 1.0979 60.3498 0.7068 0.1403-0.1932 International_Tables_Vol_IV_Table_2.2B'S   ' 0.1246 0.1234 6.9053 1.4679 5.2034 22.2151 1.4379 0.2536 1.5863 56.17200.8669 International_Tables_Vol_IV_Table_2.2B_cell_formula_units_Z            2_chemical_formula_sum            'C19 H22 Ag1 F3 Ir1 N1 O5 S1 '_chemical_formula_moiety         '(C16 H19 Ag1 Ir1 O2 1+) (C2 H3 N1) (C1 F3 S1 O3 1-)'_chemical_compound_source        ;?;_chemical_formula_weight         733.54_cell_measurement_reflns_used    153_cell_measurement_theta_min      4.7_cell_measurement_theta_max      22.3_cell_measurement_temperature    295_exptl_crystal_description       ' block '_exptl_crystal_colour            ' colourless '_exptl_crystal_size_min          0.22_exptl_crystal_size_mid          0.25_exptl_crystal_size_max          0.27_exptl_crystal_density_diffrn    2.172_exptl_crystal_density_meas      ?# Non-dispersive F(000): _exptl_crystal_F_000             700.000_exptl_absorpt_coefficient_mu    6.947_diffrn_measurement_device_type  ; Enraf Nonius Kappa CCD ;_diffrn_radiation_monochromator  graphite_computing_data_collection       ; COLLECT (Nonius BV, 1997) ;_computing_data_reduction        ; Denzo/Scalepack (Otwinowski & Minor, 1996) ;_computing_cell_refinement       ; Denzo/Scalepack (Otwinowski & Minor, 1996) ;_computing_structure_solution    ; USER DEFINED STRUCTURE SOLUTION ;_diffrn_measurement_method       \w_exptl_absorpt_correction_type   refdelf_exptl_absorpt_process_details   ; DIFABS (Walker & Stuart, 1983) ;_exptl_absorpt_correction_T_min  0.89_exptl_absorpt_correction_T_max  0.92_diffrn_ambient_temperature      295_diffrn_reflns_number            10959_reflns_number_total             5110_diffrn_reflns_av_R_equivalents  0.13# Number of reflections with Friedels Law is 5110 # Number of reflections without Friedels Law is 0 # Theoretical number of reflections is about 5154 _diffrn_reflns_theta_min         1.580_diffrn_reflns_theta_max         27.500_diffrn_measured_fraction_theta_max 0.991_diffrn_reflns_theta_full        26.675_diffrn_measured_fraction_theta_full 0.995_diffrn_reflns_limit_h_min       -10_diffrn_reflns_limit_h_max       10_diffrn_reflns_limit_k_min       -13_diffrn_reflns_limit_k_max       14_diffrn_reflns_limit_l_min       -17_diffrn_reflns_limit_l_max       16_reflns_limit_h_min              -10_reflns_limit_h_max              10_reflns_limit_k_min              -14_reflns_limit_k_max              14_reflns_limit_l_min              0_reflns_limit_l_max              17_refine_diff_density_min         -2.87_refine_diff_density_max         3.17_refine_ls_number_reflns         4385_refine_ls_number_parameters     252#_refine_ls_R_factor_ref 0.0516 _refine_ls_wR_factor_ref         0.0586_refine_ls_goodness_of_fit_ref   1.0810#_reflns_number_all 5110 _refine_ls_R_factor_all          0.0614_refine_ls_wR_factor_all         0.0687# The I/u(I) cutoff below was used for refinement as # well as the _gt R-factors:_reflns_threshold_expression     I>3.00u(I)_reflns_number_gt                4389_refine_ls_R_factor_gt           0.0528_refine_ls_wR_factor_gt          0.0586_refine_ls_shift/su_max          0.001540_refine_ls_structure_factor_coef F_refine_ls_weighting_scheme      calc_refine_ls_weighting_details     ;Method = Prince modified Chebychev polynomial, (Watkin, 1994) W = [weight] * [1-(deltaF/6*sigmaF)^2]^2 1.19 0.261 0.773 ;_diffrn_radiation_type           'Mo K\a'_diffrn_radiation_wavelength     0.71073## -------------------REFERENCES ----------------------## ## Insert your own references - in alphabetic order _publ_section_references         ; User-defined structure solution reference COLLECT Software, Nonius BV 1997-2001) Otwinowski, Z. & Minor, W. (1996), Processing of X-ray Diffraction Data Collected in Oscillation Mode. Methods Enzymol. 276, 1997, 307-326. Ed Carter, C.W. & Sweet, R.M., Academic Press. Walker, N., and Stuart, D. Acta Cryst, (1983) A39, 158-166 Watkin D.J. (1994), Acta Cryst, A50, 411-437 Prince, E. Mathematical Techniques in Crystallography and Materials Science Springer-Verlag, New York, 1982. Watkin, D.J., Prout, C.K., Carruthers, J.R., Betteridge, P.W. & Cooper R.I. (2001) CRYSTALS Issue 11. Chemical Crystallography Laboratory, OXFORD, UK. Watkin, D.J., Prout, C.K. & Pearce, L.J. (1996) CAMERON, Chemical Crystallography Laboratory, OXFORD, UK. ;# Uequiv = arithmetic mean of Ui# i.e. Ueqiv = (U1+U2+U3)/3# Replace trailing . with the number of unfound# hydrogen atoms attaced to relavent atomloop__atom_site_label_atom_site_type_symbol_atom_site_fract_x_atom_site_fract_y_atom_site_fract_z_atom_site_U_iso_or_equiv_atom_site_occupancy_atom_site_adp_type_atom_site_attached_hydrogensAg1 Ag 0.0125(1) 0.83724(7) 0.48308(7) 0.0487 1.0000 Uani .Ir1 Ir 0.46062(3) 0.85125(2) 0.242041(19) 0.0211 1.0000 Uani .C1 C 0.240(1) 0.8046(8) 0.3419(6) 0.0310 1.0000 Uani .C2 C 0.350(1) 0.7205(7) 0.3341(6) 0.0305 1.0000 Uani .C3 C 0.5379(11) 0.7662(8) 0.3745(6) 0.0315 1.0000 Uani .C4 C 0.637(1) 0.8994(7) 0.4198(6) 0.0294 1.0000 Uani .C5 C 0.535(1) 0.9826(8) 0.3898(6) 0.0306 1.0000 Uani .C6 C 0.344(1) 0.9368(7) 0.3485(6) 0.0289 1.0000 Uani .C11 C 0.3429(12) 0.8750(9) 0.0867(6) 0.0365 1.0000 Uani .C12 C 0.5146(12) 0.9690(8) 0.1337(6) 0.0344 1.0000 Uani .C13 C 0.6456(11) 0.9034(9) 0.1555(6) 0.0349 1.0000 Uani .C14 C 0.5505(13) 0.7685(8) 0.1221(6) 0.0362 1.0000 Uani .C15 C 0.3656(13) 0.7527(9) 0.0781(6) 0.0394 1.0000 Uani .C16 C 0.1677(16) 0.9040(15) 0.0484(9) 0.0643 1.0000 Uani .C17 C 0.5598(15) 1.114(1) 0.1525(8) 0.0495 1.0000 Uani .C18 C 0.8446(13) 0.9634(12) 0.206(1) 0.0554 1.0000 Uani .C19 C 0.639(2) 0.6629(11) 0.1229(12) 0.0658 1.0000 Uani .C20 C 0.220(2) 0.6262(13) 0.030(1) 0.0689 1.0000 Uani .C100 C 0.671(2) 0.6787(16) 0.6563(16) 0.0849 1.0000 Uani .C101 C 0.1211(13) 0.625(1) 0.6180(9) 0.0493 1.0000 Uani .C102 C 0.159(2) 0.5370(13) 0.6851(14) 0.0801 1.0000 Uani .N1 N 0.0915(14) 0.6946(11) 0.5665(9) 0.0656 1.0000 Uani .O1 O 0.0763(8) 0.7659(6) 0.3257(6) 0.0443 1.0000 Uani .O2 O 0.8069(7) 0.9411(6) 0.4645(5) 0.0381 1.0000 Uani .S1 S 0.7506(4) 0.6650(3) 0.7848(3) 0.0602 1.0000 Uani .O101 O 0.8900(19) 0.6141(13) 0.7888(11) 0.103(4) 1.0000 Uiso .O102 O 0.802(2) 0.7965(17) 0.8381(14) 0.131(5) 1.0000 Uiso .O103 O 0.606(3) 0.581(2) 0.7975(18) 0.163(7) 1.0000 Uiso .F1 F 0.793(2) 0.7741(17) 0.6336(14) 0.160(6) 1.0000 Uiso .F2 F 0.668(3) 0.5912(19) 0.5871(15) 0.167(6) 1.0000 Uiso .F3 F 0.5309(14) 0.722(1) 0.6361(8) 0.094(3) 1.0000 Uiso .H21 H 0.2891 0.6275 0.2980 0.105(12) 1.0000 Uiso .H31 H 0.6070 0.7035 0.3728 0.105(12) 1.0000 Uiso .H51 H 0.5982 1.0756 0.3977 0.105(12) 1.0000 Uiso .H61 H 0.2798 0.9986 0.3240 0.105(12) 1.0000 Uiso .H161 H 0.0648 0.8217 0.0186 0.105(12) 1.0000 Uiso .H162 H 0.1709 0.9556 -0.0068 0.105(12) 1.0000 Uiso .H163 H 0.1451 0.9545 0.1071 0.105(12) 1.0000 Uiso .H171 H 0.6913 1.1561 0.1868 0.105(12) 1.0000 Uiso .H172 H 0.5225 1.1415 0.0846 0.105(12) 1.0000 Uiso .H173 H 0.4939 1.1440 0.1981 0.105(12) 1.0000 Uiso .H181 H 0.9071 0.8958 0.2123 0.105(12) 1.0000 Uiso .H182 H 0.8984 1.0239 0.1660 0.105(12) 1.0000 Uiso .H183 H 0.8723 1.0140 0.2790 0.105(12) 1.0000 Uiso .H191 H 0.5455 0.5765 0.0975 0.105(12) 1.0000 Uiso .H192 H 0.7188 0.6742 0.0795 0.105(12) 1.0000 Uiso .H193 H 0.7132 0.6684 0.1971 0.105(12) 1.0000 Uiso .H201 H 0.2721 0.5519 0.0351 0.105(12) 1.0000 Uiso .H202 H 0.1588 0.6207 -0.0448 0.105(12) 1.0000 Uiso .H203 H 0.1271 0.6120 0.0671 0.105(12) 1.0000 Uiso .H1021 H 0.1566 0.4563 0.6434 0.105(12) 1.0000 Uiso .H1022 H 0.0697 0.5198 0.7225 0.105(12) 1.0000 Uiso .H1023 H 0.2829 0.5794 0.7374 0.105(12) 1.0000 Uiso .loop__atom_site_aniso_label_atom_site_aniso_U_11_atom_site_aniso_U_22_atom_site_aniso_U_33_atom_site_aniso_U_23_atom_site_aniso_U_13_atom_site_aniso_U_12Ag1 0.0373(4) 0.0429(4) 0.0678(5) 0.0147(3) 0.0158(3) 0.0151(3)Ir1 0.02134(17) 0.02216(17) 0.01892(17) 0.00405(9) 0.0061(1) 0.0062(1)C1 0.027(3) 0.039(4) 0.026(3) 0.005(3) 0.007(3) 0.010(3)C2 0.028(3) 0.028(3) 0.033(4) 0.011(3) 0.010(3) 0.001(3)C3 0.034(4) 0.036(4) 0.032(4) 0.018(3) 0.012(3) 0.017(3)C4 0.031(4) 0.034(4) 0.025(3) 0.006(3) 0.011(3) 0.012(3)C5 0.030(4) 0.034(4) 0.023(3) 0.003(3) 0.004(3) 0.008(3)C6 0.031(4) 0.029(3) 0.027(3) -0.000(3) 0.010(3) 0.011(3)C11 0.042(4) 0.050(5) 0.020(3) 0.010(3) 0.010(3) 0.017(4)C12 0.051(5) 0.035(4) 0.027(4) 0.011(3) 0.019(3) 0.020(4)C13 0.035(4) 0.044(4) 0.032(4) 0.014(3) 0.016(3) 0.015(3)C14 0.050(5) 0.040(4) 0.028(4) 0.004(3) 0.022(3) 0.021(4)C15 0.045(5) 0.042(4) 0.024(4) 0.002(3) 0.008(3) 0.008(4)C16 0.049(6) 0.11(1) 0.046(6) 0.025(6) 0.006(5) 0.046(6)C17 0.064(6) 0.051(5) 0.044(5) 0.022(4) 0.026(5) 0.022(5)C18 0.029(4) 0.068(7) 0.078(8) 0.027(6) 0.024(5) 0.018(4)C19 0.084(9) 0.048(6) 0.088(9) 0.015(6) 0.046(7) 0.037(6)C20 0.077(8) 0.059(7) 0.047(6) -0.009(5) 0.008(6) 0.005(6)C100 0.072(9) 0.069(9) 0.115(13) 0.024(9) 0.014(9) 0.039(7)C101 0.040(5) 0.044(5) 0.065(6) 0.021(5) 0.010(4) 0.018(4)C102 0.077(9) 0.056(7) 0.116(12) 0.049(8) 0.027(8) 0.024(6)N1 0.058(6) 0.068(6) 0.074(7) 0.024(5) 0.019(5) 0.022(5)O1 0.026(3) 0.045(3) 0.057(4) 0.005(3) 0.013(3) 0.005(2)O2 0.022(3) 0.042(3) 0.039(3) 0.002(2) -0.003(2) 0.007(2)S1 0.0542(15) 0.0602(16) 0.0608(17) 0.0097(13) 0.0078(13) 0.0213(13)_refine_ls_extinction_coef       116.7_refine_ls_extinction_method     'Larson 1970 Crystallographic Computing eq 22'loop__geom_bond_atom_site_label_1_geom_bond_site_symmetry_1_geom_bond_atom_site_label_2_geom_bond_site_symmetry_2_geom_bond_distance_geom_bond_publ_flagAg1 . N1 . 2.192(11) yesAg1 . O1 . 2.441(7) yesAg1 . O2 1_455 2.253(6) yesAg1 . O2 2_676 2.398(6) yesIr1 . C2 . 2.207(7) yesIr1 . C3 . 2.167(7) yesIr1 . C4 . 2.379(7) yesIr1 . C5 . 2.170(7) yesIr1 . C6 . 2.196(7) yesIr1 . C11 . 2.165(8) yesIr1 . C12 . 2.151(8) yesIr1 . C13 . 2.168(8) yesIr1 . C14 . 2.173(7) yesIr1 . C15 . 2.198(8) yesC1 . C2 . 1.466(11) yesC1 . C6 . 1.458(11) yesC1 . O1 . 1.24(1) yesC2 . C3 . 1.404(11) yesC2 . H21 . 1.008 noC3 . C4 . 1.439(11) yesC3 . H31 . 1.006 noC4 . C5 . 1.428(11) yesC4 . O2 . 1.278(9) yesC5 . C6 . 1.42(1) yesC5 . H51 . 0.998 noC6 . H61 . 1.006 noC11 . C12 . 1.423(13) yesC11 . C15 . 1.407(13) yesC11 . C16 . 1.519(13) yesC12 . C13 . 1.434(12) yesC12 . C17 . 1.512(13) yesC13 . C14 . 1.433(12) yesC13 . C18 . 1.504(13) yesC14 . C15 . 1.419(13) yesC14 . C19 . 1.531(13) yesC15 . C20 . 1.502(15) yesC16 . H161 . 1.006 noC16 . H162 . 1.005 noC16 . H163 . 1.009 noC17 . H171 . 0.999 noC17 . H172 . 1.011 noC17 . H173 . 1.011 noC18 . H181 . 1.011 noC18 . H182 . 1.008 noC18 . H183 . 1.013 noC19 . H191 . 1.001 noC19 . H192 . 0.987 noC19 . H193 . 1.016 noC20 . H201 . 1.021 noC20 . H202 . 0.992 noC20 . H203 . 1.020 noC100 . S1 . 1.74(2) yesC100 . F1 . 1.37(2) yesC100 . F2 . 1.26(2) yesC100 . F3 . 1.330(16) yesC101 . C102 . 1.450(16) yesC101 . N1 . 1.140(14) yesC102 . H1021 . 0.990 noC102 . H1022 . 0.991 noC102 . H1023 . 1.014 noS1 . O101 . 1.390(14) yesS1 . O102 . 1.437(18) yesS1 . O103 . 1.36(2) yesloop__geom_angle_atom_site_label_1_geom_angle_site_symmetry_1_geom_angle_atom_site_label_2_geom_angle_site_symmetry_2_geom_angle_atom_site_label_3_geom_angle_site_symmetry_3_geom_angle_geom_angle_publ_flagN1 . Ag1 . O1 . 96.7(4) yesN1 . Ag1 . O2 1_455 139.3(3) yesO1 . Ag1 . O2 1_455 116.0(2) yesN1 . Ag1 . O2 2_676 120.7(3) yesO1 . Ag1 . O2 2_676 102.4(2) yesO2 1_455 Ag1 . O2 2_676 77.1(2) yesC2 . Ir1 . C3 . 37.4(3) yesC2 . Ir1 . C4 . 65.9(3) yesC3 . Ir1 . C4 . 36.5(3) yesC2 . Ir1 . C5 . 78.9(3) yesC3 . Ir1 . C5 . 66.7(3) yesC4 . Ir1 . C5 . 36.2(3) yesC2 . Ir1 . C6 . 65.7(3) yesC3 . Ir1 . C6 . 78.6(3) yesC4 . Ir1 . C6 . 65.9(3) yesC5 . Ir1 . C6 . 38.0(3) yesC2 . Ir1 . C11 . 130.8(3) yesC3 . Ir1 . C11 . 162.4(3) yesC4 . Ir1 . C11 . 160.9(3) yesC5 . Ir1 . C11 . 129.4(3) yesC6 . Ir1 . C11 . 109.7(3) yesC2 . Ir1 . C12 . 168.8(3) yesC3 . Ir1 . C12 . 153.8(3) yesC4 . Ir1 . C12 . 124.0(3) yesC5 . Ir1 . C12 . 106.1(3) yesC6 . Ir1 . C12 . 111.9(3) yesC2 . Ir1 . C13 . 148.6(3) yesC3 . Ir1 . C13 . 118.9(3) yesC4 . Ir1 . C13 . 106.6(3) yesC5 . Ir1 . C13 . 113.8(3) yesC6 . Ir1 . C13 . 141.6(3) yesC2 . Ir1 . C14 . 116.8(3) yesC3 . Ir1 . C14 . 107.1(3) yesC4 . Ir1 . C14 . 120.7(3) yesC5 . Ir1 . C14 . 147.1(3) yesC6 . Ir1 . C14 . 173.3(3) yesC2 . Ir1 . C15 . 109.8(3) yesC3 . Ir1 . C15 . 126.1(3) yesC4 . Ir1 . C15 . 155.9(3) yesC5 . Ir1 . C15 . 167.1(3) yesC6 . Ir1 . C15 . 135.9(3) yesC11 . Ir1 . C12 . 38.5(3) yesC11 . Ir1 . C13 . 64.5(3) yesC12 . Ir1 . C13 . 38.8(3) yesC11 . Ir1 . C14 . 63.8(3) yesC12 . Ir1 . C14 . 64.4(3) yesC13 . Ir1 . C14 . 38.6(3) yesC11 . Ir1 . C15 . 37.6(3) yesC12 . Ir1 . C15 . 63.7(3) yesC13 . Ir1 . C15 . 63.9(3) yesC14 . Ir1 . C15 . 37.9(3) yesC2 . C1 . C6 . 109.6(6) yesC2 . C1 . O1 . 124.4(7) yesC6 . C1 . O1 . 124.8(8) yesIr1 . C2 . C1 . 84.4(5) yesIr1 . C2 . C3 . 69.8(4) yesC1 . C2 . C3 . 121.9(7) yesIr1 . C2 . H21 . 116.509 noC1 . C2 . H21 . 119.211 noC3 . C2 . H21 . 118.901 noIr1 . C3 . C2 . 72.8(4) yesIr1 . C3 . C4 . 79.8(4) yesC2 . C3 . C4 . 122.9(7) yesIr1 . C3 . H31 . 120.467 noC2 . C3 . H31 . 119.051 noC4 . C3 . H31 . 118.046 noIr1 . C4 . C3 . 63.7(4) yesIr1 . C4 . C5 . 63.9(4) yesC3 . C4 . C5 . 112.4(7) yesIr1 . C4 . O2 . 131.7(6) yesC3 . C4 . O2 . 123.7(7) yesC5 . C4 . O2 . 122.4(7) yesIr1 . C5 . C4 . 79.9(4) yesIr1 . C5 . C6 . 72.0(4) yesC4 . C5 . C6 . 122.0(7) yesIr1 . C5 . H51 . 119.845 noC4 . C5 . H51 . 119.040 noC6 . C5 . H51 . 118.969 noIr1 . C6 . C1 . 85.0(4) yesIr1 . C6 . C5 . 70.0(4) yesC1 . C6 . C5 . 122.4(7) yesIr1 . C6 . H61 . 116.921 noC1 . C6 . H61 . 119.304 noC5 . C6 . H61 . 118.336 noIr1 . C11 . C12 . 70.2(4) yesIr1 . C11 . C15 . 72.5(5) yesC12 . C11 . C15 . 108.3(8) yesIr1 . C11 . C16 . 125.3(7) yesC12 . C11 . C16 . 125.1(9) yesC15 . C11 . C16 . 126.5(10) yesIr1 . C12 . C11 . 71.3(4) yesIr1 . C12 . C13 . 71.3(4) yesC11 . C12 . C13 . 108.0(7) yesIr1 . C12 . C17 . 126.0(6) yesC11 . C12 . C17 . 127.8(8) yesC13 . C12 . C17 . 124.1(8) yesIr1 . C13 . C12 . 69.9(4) yesIr1 . C13 . C14 . 70.9(4) yesC12 . C13 . C14 . 107.0(7) yesIr1 . C13 . C18 . 123.0(7) yesC12 . C13 . C18 . 126.9(8) yesC14 . C13 . C18 . 126.1(8) yesIr1 . C14 . C13 . 70.5(4) yesIr1 . C14 . C15 . 72.0(5) yesC13 . C14 . C15 . 108.1(7) yesIr1 . C14 . C19 . 128.6(7) yesC13 . C14 . C19 . 124.7(9) yesC15 . C14 . C19 . 126.8(9) yesIr1 . C15 . C11 . 69.9(5) yesIr1 . C15 . C14 . 70.1(4) yesC11 . C15 . C14 . 108.5(8) yesIr1 . C15 . C20 . 126.4(7) yesC11 . C15 . C20 . 126.3(10) yesC14 . C15 . C20 . 125.2(10) yesC11 . C16 . H161 . 110.200 noC11 . C16 . H162 . 110.542 noH161 . C16 . H162 . 108.611 noC11 . C16 . H163 . 110.697 noH161 . C16 . H163 . 108.334 noH162 . C16 . H163 . 108.387 noC12 . C17 . H171 . 110.676 noC12 . C17 . H172 . 110.296 noH171 . C17 . H172 . 108.688 noC12 . C17 . H173 . 110.639 noH171 . C17 . H173 . 108.707 noH172 . C17 . H173 . 107.755 noC13 . C18 . H181 . 111.224 noC13 . C18 . H182 . 111.308 noH181 . C18 . H182 . 107.980 noC13 . C18 . H183 . 110.702 noH181 . C18 . H183 . 107.588 noH182 . C18 . H183 . 107.883 noC14 . C19 . H191 . 109.923 noC14 . C19 . H192 . 110.362 noH191 . C19 . H192 . 110.466 noC14 . C19 . H193 . 108.699 noH191 . C19 . H193 . 108.145 noH192 . C19 . H193 . 109.192 noC15 . C20 . H201 . 110.683 noC15 . C20 . H202 . 111.722 noH201 . C20 . H202 . 108.449 noC15 . C20 . H203 . 111.042 noH201 . C20 . H203 . 106.279 noH202 . C20 . H203 . 108.470 noS1 . C100 . F1 . 111.0(14) yesS1 . C100 . F2 . 117.1(13) yesF1 . C100 . F2 . 94.7(18) yesS1 . C100 . F3 . 114.3(14) yesF1 . C100 . F3 . 99.9(13) yesF2 . C100 . F3 . 116.2(17) yesC102 . C101 . N1 . 179.1(14) yesC101 . C102 . H1021 . 109.866 noC101 . C102 . H1022 . 109.516 noH1021 . C102 . H1022 . 110.977 noC101 . C102 . H1023 . 108.281 noH1021 . C102 . H1023 . 109.113 noH1022 . C102 . H1023 . 109.037 noAg1 . N1 . C101 . 171.3(11) yesAg1 . O1 . C1 . 109.2(5) yesAg1 1_655 O2 . Ag1 2_676 102.9(2) yesAg1 1_655 O2 . C4 . 130.5(5) yesAg1 2_676 O2 . C4 . 125.5(5) yesC100 . S1 . O101 . 105.3(8) yesC100 . S1 . O102 . 100.8(9) yesO101 . S1 . O102 . 115.7(9) yesC100 . S1 . O103 . 102.9(11) yesO101 . S1 . O103 . 112.7(11) yesO102 . S1 . O103 . 116.9(12) yes
